# Supplementary material
Source: MDPI journal article supplement (https://www.mdpi.com/2073-4433/13/2/184)
Supplement: s1 [file s1]

*Supplementary Material*

# How much green is really ‘cool’? Target setting for thermal comfort enhancement in a warm, humid city (Jakarta, Indonesia)

Hanna Meiria Naomi Stepani, Rohinton Emmanuel

ENVI-met models used for the study

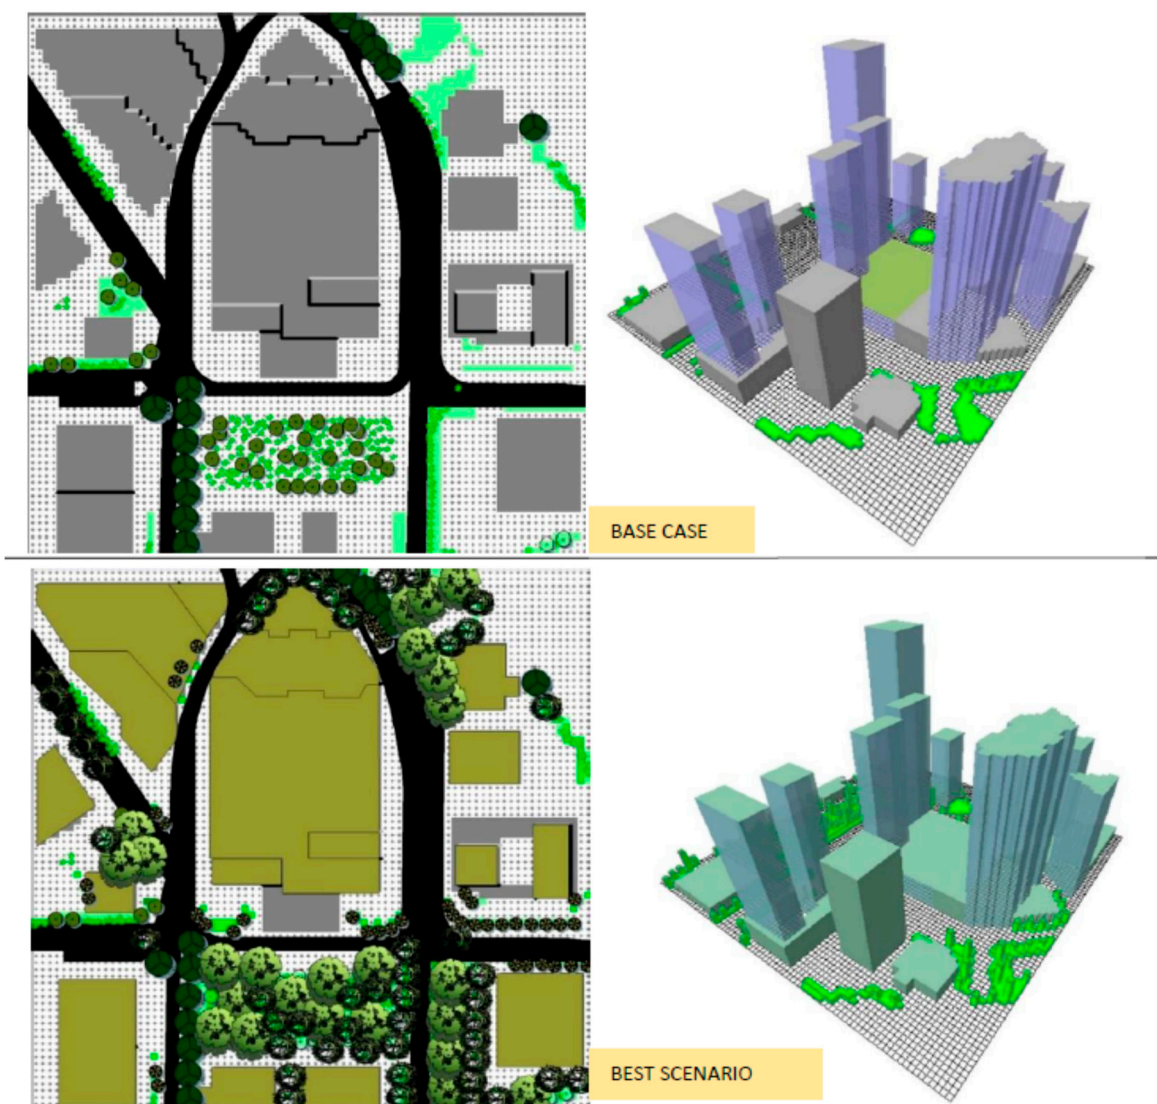

‘Base’ case (top) ‘Best’ case (bottom) – LCZ1

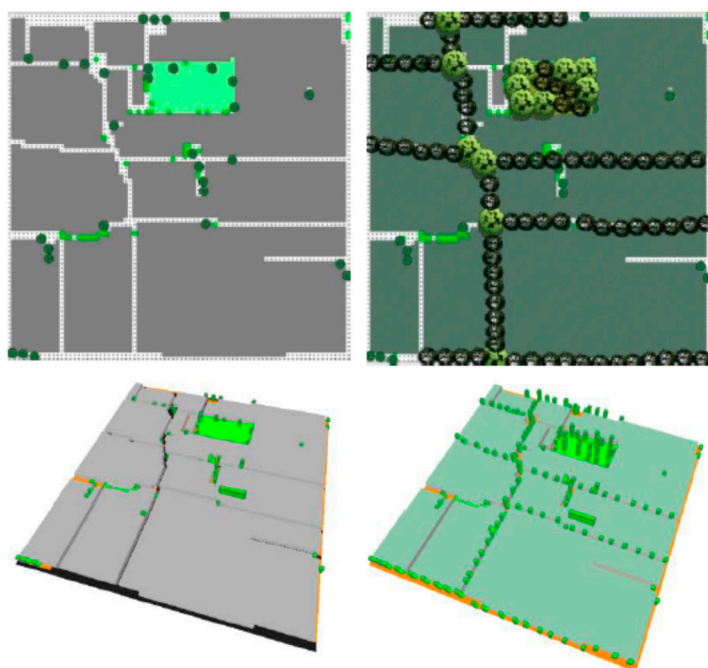

'Base' case (left) 'Best' case (right) – LCZ3

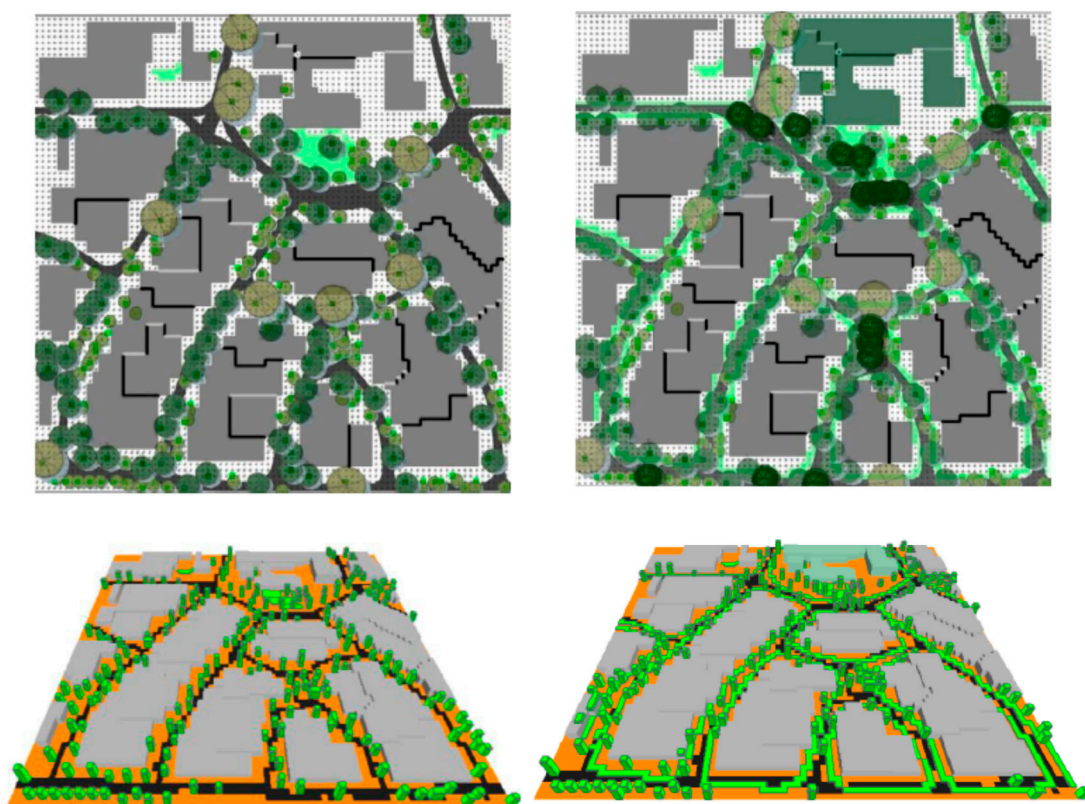

'Base' case (left) 'Best' case (right) – LCZ6

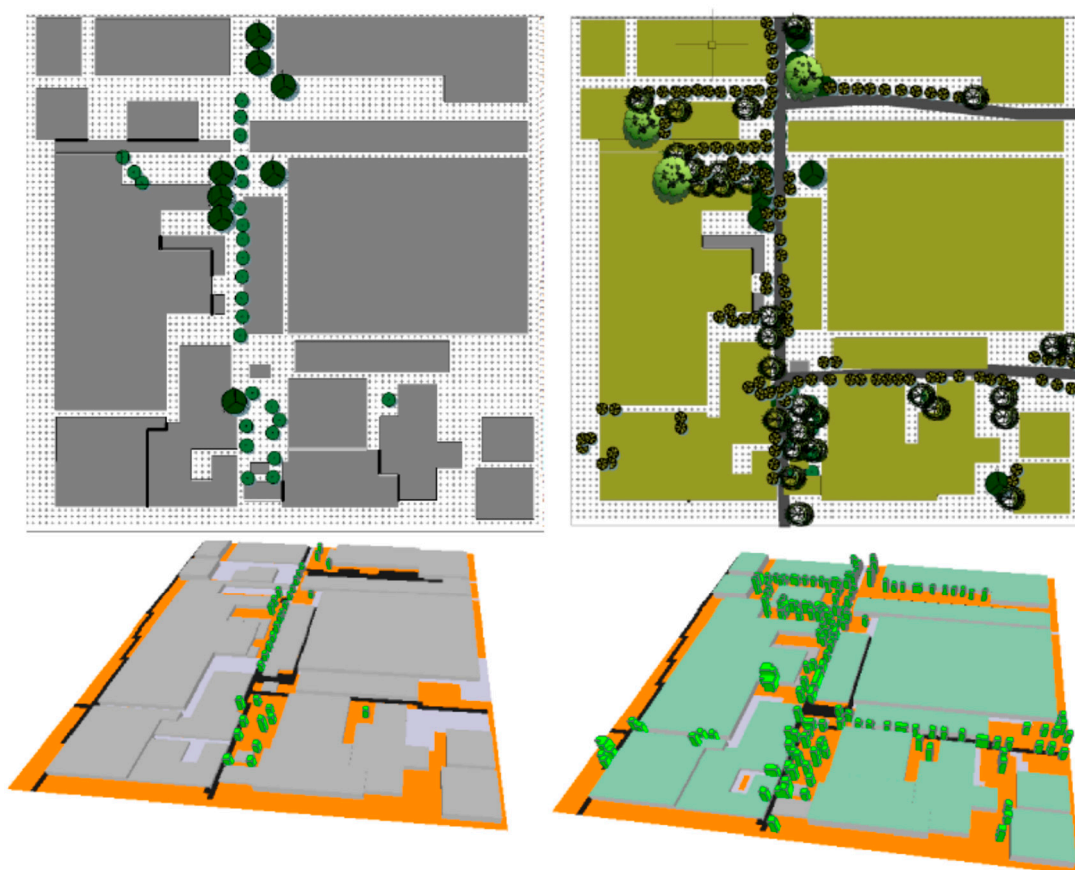

'Base' case (left) 'Best' case (right) – LCZ8

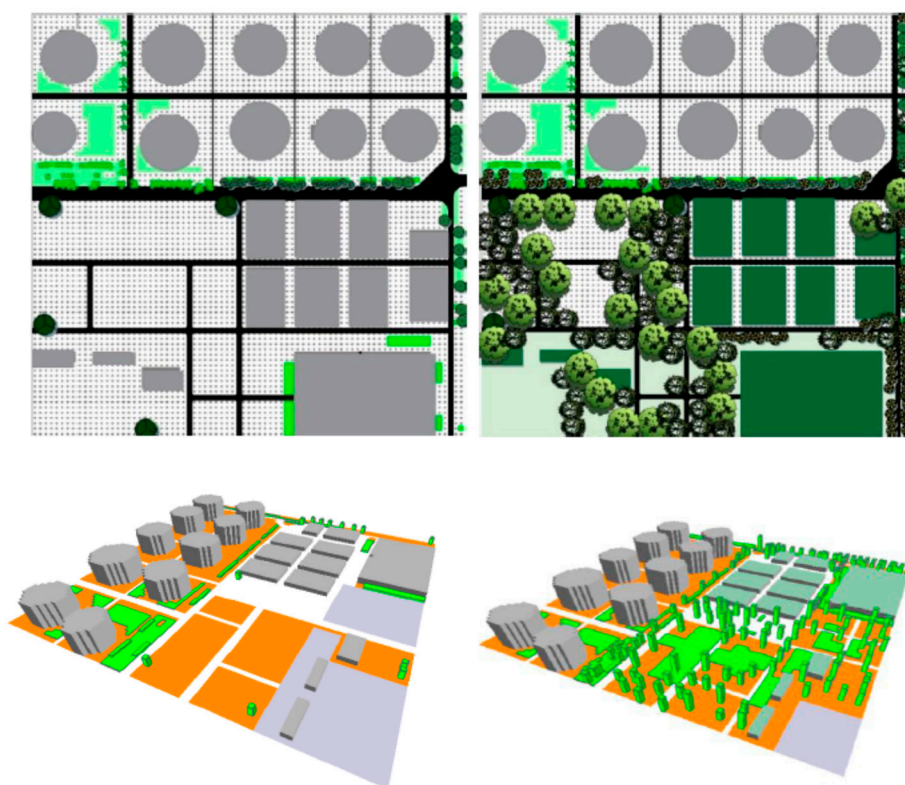

'Base' case (left) 'Best' case (right) – LCZ10
